# Supplementary material for: Research is still limited on nutrition and quality of life among older adults
Source: PubMed Central journal article supplement (PMC10536330; doi:10.3389/fmed.2023.1225689), 2023-09-12
Supplement: Table_1.pdf [file Table_1.pdf]

## Supplementary Material

**Figure.** Complete research string used for nutrition and quality of life scoping review.

Search String

("nutrition"[Title/Abstract] OR "nutritional"[Title/Abstract]  
OR "food"[MeSH Terms] OR "food"[Title/Abstract]  
OR "diet"[MeSH Terms]  
OR "hunger"[MeSH Terms]  
OR "food insecurity"[MeSH Terms])

AND

("Independent Living"[Mesh] OR community living)

AND

("15-D"[All Fields] OR "15-Dimensional instrument"[All Fields] OR "Alzheimer's Disease-Related Quality of Life"[All Fields] OR "ADRQOL"[All Fields] OR "AQoL-8D"[All Fields] OR "Assessment of Quality of Life instrument – 8D Version" [All Fields] OR "ASCOT"[All Fields] OR "Adult Social Care Outcomes Toolkit" [All Fields] OR "CAD-EOLD"[All Fields] OR " Comfort Around Dying-End of Life in Dementia" [All Fields] OR "COMQOL"[All Fields] OR "Comprehensive Quality of Life Scale" [All Fields] OR "DEMQOL"[All Fields] OR "Dementia Quality of Life measure"[All Fields] OR "DUKE"[All Fields] OR "Duke Health Profile "[All Fields] OR "DQOL"[All Fields] OR "Dementia Quality of Life Instrument"[All Fields] OR "EQ-5D"[All Fields] OR "EuroQol - 5 Dimensions "[All Fields] OR "EuroQol" [All Fields] OR "HUI2/3"[All Fields] OR "Health Utility Index " [All Fields] OR "ICECAP-O"[All Fields] OR "ICEpop CAPability"[All Fields] OR ("inter rai"[All Fields] AND "ltcf"[All Fields]) OR "Inter-RAI (LTCF)"[All Fields] OR "JoLS"[All Fields] OR "Joy-of-Life Scale"[All Fields] OR "MANSA"[All Fields] OR "Manchester Short Assessment"[All Fields] OR "NHP"[All Fields] OR "Nottingham Health Profile"[All Fields] OR "NHVQOL"[All Fields] OR "Nursing Home Vision-related Quality Of Life"[All Fields] OR "OHIP"[All Fields] OR " Oral Health Impact Profile"[All Fields] OR "OPQOL"[All Fields] OR "Older Peoples Quality Of Life"[All Fields] OR "PGCMS"[All Fields] OR "Philadelphia Geriatric Centre Moral Scale "[All Fields] OR "QOL-AD"[All Fields] OR "Quality of Life in Alzheimer's Disease"[All Fields] OR "LTC-QOL"[All Fields] OR "Long Term Care Quality Of Life assessment"[All Fields] OR "QUALID"[All Fields] OR "Quality of Life In Late-Stage Dementia"[All Fields] OR "QUALIDEM"[All Fields] OR "Dementia Specific Quality of Life Instrument"[All Fields] OR "SF-36"[All Fields] OR "36 Item Shot Form"[All Fields] OR "SWLS"[All Fields] OR "Satisfaction With Life Scale"[All Fields] OR "whoqol age"[All Fields] OR "World Health Organization Quality of Life Scale - AGE"[All Fields] OR "WHOQOL-BREF"[All Fields] OR "World Health Organization Quality of Life Scale - BREF"[All Fields] OR "WHOQOL-OLD"[All Fields] OR "World Health Organization Quality of Life Scale – OLD"[All Fields]  
OR  
"quality of life"[MeSH Terms])

AND

((2000:2023[pdat]) AND (aged[Filter] OR 80andover[Filter]))

**Table.** Nutrition indices and QoL instruments used in studies included in nutrition and quality of life scoping review.

| Study Objective                                                                                                                                          | QoL Instrument(s) used | Nutrition Indices Used |                           |                           |                                      |     |                                     |                                                            |                   |                 | Country             | Title (Year)                                                                                                                                                                             |
|----------------------------------------------------------------------------------------------------------------------------------------------------------|------------------------|------------------------|---------------------------|---------------------------|--------------------------------------|-----|-------------------------------------|------------------------------------------------------------|-------------------|-----------------|---------------------|------------------------------------------------------------------------------------------------------------------------------------------------------------------------------------------|
|                                                                                                                                                          |                        | Questionnaire          |                           |                           | Anthropometric                       |     |                                     | Biochemical                                                |                   |                 |                     |                                                                                                                                                                                          |
|                                                                                                                                                          |                        | Diet <sup>1</sup>      | Difficulties <sup>2</sup> | Nutrition screening tools | Height, weight, and/or weight change | BMI | Skinfold(s) and/or circumference(s) | Bioelectrical impedance, or dual-energy x-ray <sup>3</sup> | Handgrip strength | Plasma vitamins |                     |                                                                                                                                                                                          |
| <b>Nutrition Intervention-focused Studies</b>                                                                                                            |                        |                        |                           |                           |                                      |     |                                     |                                                            |                   |                 |                     |                                                                                                                                                                                          |
| Examine if nutrition supplementation after discharge from hospital improved nutrition status and functional outcomes, or reduced healthcare costs.       | EQ-5D                  | ✓                      |                           |                           | ✓                                    | ✓   | ✓                                   |                                                            | ✓                 |                 | United Kingdom (UK) | A prospective randomised controlled trial of nutritional supplementation in malnourished elderly in the community: clinical and health economic outcomes (2004) (1)                      |
| Examine whether supplementation with multivitamins and multiminerals influenced self-reported days of infection, use of health services and QoL.         | EQ-5D, SF-12           | ✓                      |                           |                           |                                      |     |                                     |                                                            |                   |                 | Scotland            | Effect of multivitamin and multimineral supplements on morbidity from infections in older people (MAVIS trial): pragmatic, randomised, double blind, placebo controlled trial (2005) (2) |
| Examine effect of individually-adapted nutrition counselling in weight loss among older adults 3 months after discharge from rehabilitation institution. | EQ-5D                  |                        | ✓                         | NRS-2002                  | ✓                                    | ✓   |                                     |                                                            |                   |                 | Norway              | Effect on body weight, quality of life and appetite following individualized, nutritional counselling to home-living elderly after rehabilitation - an open randomized trial (2017) (3)  |
| Examine efficacy of providing early nutrition intervention and its continuation in older patients discharged from acute care.                            | EQ-5D                  |                        |                           | MST, PG-SGA               | ✓                                    | ✓   | ✓                                   |                                                            | ✓                 |                 | Australia           | Investigation of the benefits of early malnutrition screening with telehealth follow up in elderly acute medical admissions (2017) (4)                                                   |

**Table. (continued)**

| Study Objective                                                                                                                                                                                                                     | QoL Instrument(s) used | Nutrition Indices Used |                           |                           |                                      |     |                                     |                                                            |                   |                 |               | Country | Title (Year)                                                                                                                                                                               |
|-------------------------------------------------------------------------------------------------------------------------------------------------------------------------------------------------------------------------------------|------------------------|------------------------|---------------------------|---------------------------|--------------------------------------|-----|-------------------------------------|------------------------------------------------------------|-------------------|-----------------|---------------|---------|--------------------------------------------------------------------------------------------------------------------------------------------------------------------------------------------|
|                                                                                                                                                                                                                                     |                        | Questionnaire          |                           |                           | Anthropometric                       |     |                                     |                                                            | Biochemical       |                 |               |         |                                                                                                                                                                                            |
|                                                                                                                                                                                                                                     |                        | Diet <sup>1</sup>      | Difficulties <sup>2</sup> | Nutrition screening tools | Height, weight, and/or weight change | BMI | Skinfold(s) and/or circumference(s) | Bioelectrical impedance, or dual-energy x-ray <sup>3</sup> | Handgrip strength | Plasma vitamins | Serum albumin |         |                                                                                                                                                                                            |
| Test acceptability, feasibility, preliminary efficacy of technology-supported energy- and protein-enforced home-delivered meals for older patients discharged from hospital.                                                        | EQ-5D                  | ✓                      | ✓                         | NRS-2002                  | ✓                                    | ✓   |                                     |                                                            | ✓                 |                 |               | Denmark | Older patients' use of technology for a post-discharge nutritional intervention – A mixed-methods feasibility study (2017) (5)                                                             |
| Evaluate effectiveness of diabetes-specific oral nutrition supplement on nutrition status, QoL, function in malnourished/risk of malnutrition community-dwelling, nursing home-dwelling older adults with type 2 diabetes mellitus. | EQ-5D                  |                        |                           | MNA                       | ✓                                    | ✓   |                                     |                                                            |                   |                 |               | Spain   | Effectiveness of an oral diabetes-specific supplement on nutritional status, metabolic control, quality of life, and functional status in elderly patients. A multicentre study (2019) (6) |
| Understand if older adults have improvement in HRQoL, muscle strength, nutrition status, and other outcomes (including Satisfaction with Food-related Life) when involved in own meals as part of a rehabilitation program.         | EQ-5D                  | ✓                      | ✓                         |                           | ✓                                    | ✓   |                                     |                                                            |                   |                 |               | Denmark | Involving community-dwelling older adults in activities related to meals as part of a rehabilitation program: a single-blinded cluster-controlled study (2019) (7)                         |

**Table. (continued)**

| Study Objective                                                                                                                                                                               | QoL Instrument(s) used | Nutrition Indices Used |                           |                           |                                      |     |                                     |                                                            |                   |                 |               | Country     | Title (Year)                                                                                                                                                                |
|-----------------------------------------------------------------------------------------------------------------------------------------------------------------------------------------------|------------------------|------------------------|---------------------------|---------------------------|--------------------------------------|-----|-------------------------------------|------------------------------------------------------------|-------------------|-----------------|---------------|-------------|-----------------------------------------------------------------------------------------------------------------------------------------------------------------------------|
|                                                                                                                                                                                               |                        | Questionnaire          |                           |                           | Anthropometric                       |     |                                     | Biochemical                                                |                   |                 |               |             |                                                                                                                                                                             |
|                                                                                                                                                                                               |                        | Diet <sup>1</sup>      | Difficulties <sup>2</sup> | Nutrition screening tools | Height, weight, and/or weight change | BMI | Skinfold(s) and/or circumference(s) | Bioelectrical impedance, or dual-energy x-ray <sup>3</sup> | Handgrip strength | Plasma vitamins | Serum albumin |             |                                                                                                                                                                             |
| Test effectiveness of a resistance exercise and dietary protein intervention for older adults.                                                                                                | EQ-5D                  | ✓                      | ✓                         | SNAQ                      | ✓                                    | ✓   |                                     | ✓                                                          |                   |                 |               | Netherlands | Effectiveness of a diet and resistance exercise intervention on muscle health in older adults: ProMuscle in practice (2020) (8)                                             |
| Evaluate effects of ONS and dietary advice versus dietary advice alone on intake, weight, QoL, healthcare use, satisfaction in malnourished free-living older people.                         | EQ-5D                  | ✓                      |                           | MUST                      | ✓                                    | ✓   |                                     |                                                            |                   |                 |               | UK          | Ready-made oral nutritional supplements improve nutritional outcomes and reduce health care use--a randomised trial in older malnourished people in primary care (2020) (9) |
| Evaluate impact of nutrition supplementation on nutrition status, muscle strength, perceived health, functional status in population of community-living, frail, undernourished older adults. | SF-36                  | ✓                      |                           |                           | ✓                                    | ✓   | ✓                                   |                                                            | ✓                 |                 |               | Canada      | Benefits of nutritional supplementation in free-living, frail, undernourished elderly people: a prospective randomized community trial (2002) (10)                          |
| Determine effect of dietary intervention and micronutrient supplementation on self-reported infection.                                                                                        | SF-36                  | ✓                      |                           |                           | ✓                                    | ✓   | ✓                                   |                                                            |                   | ✓               |               | UK          | Improvement in nutritional status reduces the clinical impact of infections in older adults (2012) (11)                                                                     |

**Table. (continued)**

| Study Objective                                                                                                                                                                    | QoL Instrument(s) used | Nutrition Indices Used |                           |                           |                                      |     |                                     |                                                            |                   |                 |               | Country   | Title (Year)                                                                                                                                                                                                             |
|------------------------------------------------------------------------------------------------------------------------------------------------------------------------------------|------------------------|------------------------|---------------------------|---------------------------|--------------------------------------|-----|-------------------------------------|------------------------------------------------------------|-------------------|-----------------|---------------|-----------|--------------------------------------------------------------------------------------------------------------------------------------------------------------------------------------------------------------------------|
|                                                                                                                                                                                    |                        | Questionnaire          |                           |                           | Anthropometric                       |     |                                     |                                                            | Biochemical       |                 |               |           |                                                                                                                                                                                                                          |
|                                                                                                                                                                                    |                        | Diet <sup>1</sup>      | Difficulties <sup>2</sup> | Nutrition screening tools | Height, weight, and/or weight change | BMI | Skinfold(s) and/or circumference(s) | Bioelectrical impedance, or dual-energy x-ray <sup>3</sup> | Handgrip strength | Plasma vitamins | Serum albumin |           |                                                                                                                                                                                                                          |
| Examine whether 12-week combined physical exercise training and nutrition intervention improved physical performance, enhanced HRQoL among prefrail older, community-living women. | SF-36                  | ✓                      |                           |                           |                                      |     |                                     | ✓                                                          | ✓                 |                 | ✓             | Japan     | Effects of a combined physical training and nutrition intervention on physical performance and health-related quality of life in prefrail older women living in the community: a randomized controlled trial (2015) (12) |
| Examine effect of supplementation with coenzyme Q10 and selenium on number of days out of hospital and QoL.                                                                        | SF-36                  |                        |                           |                           |                                      | ✓   |                                     |                                                            |                   |                 |               | Denmark   | Improved health-related quality of life, and more days out of hospital with supplementation with selenium and coenzyme Q10 combined. Results from a double blind, placebo-controlled prospective study (2015) (13)       |
| Compare effects of 2 nutrition follow-up interventions in preventing short-term deterioration in ADLs; compare their effects on physical function, emotional health and HRQoL.     | SF-36                  |                        | ✓                         | MNA                       | ✓                                    | ✓   |                                     |                                                            | ✓                 |                 |               | Denmark   | Early nutritional follow-up after discharge prevents deterioration of ADL functions in malnourished, independent, geriatric patients who live alone - a randomized clinical trial (2016) (14)                            |
| Examine effect of oral testosterone and nutrition supplement on hospital admissions.                                                                                               | SF-36                  | ✓                      |                           | MNA                       | ✓                                    | ✓   |                                     | ✓                                                          | ✓                 |                 |               | Australia | The randomized control trial of the effects of testosterone and a nutritional supplement on hospital admissions in undernourished, community dwelling, older people (2016) (15)                                          |

**Table. (continued)**

| Study Objective                                                                                                                                                                   | QoL Instrument(s) used | Nutrition Indices Used |                           |                           |                                      |     |                                     |                                                            |                   |                 |               | Country                       | Title (Year)                                                                                                                                                                                      |
|-----------------------------------------------------------------------------------------------------------------------------------------------------------------------------------|------------------------|------------------------|---------------------------|---------------------------|--------------------------------------|-----|-------------------------------------|------------------------------------------------------------|-------------------|-----------------|---------------|-------------------------------|---------------------------------------------------------------------------------------------------------------------------------------------------------------------------------------------------|
|                                                                                                                                                                                   |                        | Questionnaire          |                           |                           | Anthropometric                       |     |                                     | Biochemical                                                |                   |                 |               |                               |                                                                                                                                                                                                   |
|                                                                                                                                                                                   |                        | Diet <sup>1</sup>      | Difficulties <sup>2</sup> | Nutrition screening tools | Height, weight, and/or weight change | BMI | Skinfold(s) and/or circumference(s) | Bioelectrical impedance, or dual-energy x-ray <sup>3</sup> | Handgrip strength | Plasma vitamins | Serum albumin |                               |                                                                                                                                                                                                   |
| Evaluate effects of intervention including nutrition telemonitoring, nutrition education, nurse follow-up on nutrition status, diet quality, appetite, physical functioning, QoL. | SF-36                  | ✓                      | ✓                         | MNA-SF, DHD-FFQ           | ✓                                    | ✓   |                                     |                                                            |                   |                 |               | Netherlands                   | Effects of a multi-component nutritional telemonitoring intervention on nutritional status, diet quality, physical functioning and quality of life of community-dwelling older adults (2018) (16) |
| Examine effects of physical activity program in combination with protein supplementation on HRQoL, depressive symptoms in community-dwelling, mobility-limited older adults.      | SF-36                  |                        |                           | MNA-SF                    |                                      | ✓   |                                     | ✓                                                          | ✓                 | ✓               |               | Sweden and United States (US) | Effect of exercise and nutritional supplementation on health-related quality of life and mood in older adults: the VIVE2 randomized controlled trial (2018) (17)                                  |
| Consider LBM, muscle performance, physical function, protein intake needed in older adults with physical function limitation to optimize anabolic response to testosterone.       | SF-36                  | ✓                      |                           |                           | ✓                                    | ✓   |                                     | ✓                                                          |                   |                 | ✓             | US                            | Effect of protein intake on lean body mass in functionally limited older men: a randomized clinical trial (2018) (18)                                                                             |
| Evaluate effectiveness of exercise program and 2 types of protein supplements in pre-frail community-living older adults.                                                         | SF-36                  | ✓                      |                           | MNA-SF                    |                                      |     |                                     | ✓                                                          | ✓                 |                 |               | Australia                     | A randomized controlled pilot exercise and protein effectiveness supplementation study (EXPRESS) on reducing frailty risk in community-dwelling older people (2021) (19)                          |

**Table. (continued)**

| Study Objective                                                                                                                                                                                        | QoL Instrument(s) used | Nutrition Indices Used |                           |                           |                                      |     |                                     |                                                            |                   |                 |               | Country     | Title (Year)                                                                                                                                                                  |
|--------------------------------------------------------------------------------------------------------------------------------------------------------------------------------------------------------|------------------------|------------------------|---------------------------|---------------------------|--------------------------------------|-----|-------------------------------------|------------------------------------------------------------|-------------------|-----------------|---------------|-------------|-------------------------------------------------------------------------------------------------------------------------------------------------------------------------------|
|                                                                                                                                                                                                        |                        | Questionnaire          |                           |                           | Anthropometric                       |     |                                     | Biochemical                                                |                   |                 |               |             |                                                                                                                                                                               |
|                                                                                                                                                                                                        |                        | Diet <sup>1</sup>      | Difficulties <sup>2</sup> | Nutrition screening tools | Height, weight, and/or weight change | BMI | Skinfold(s) and/or circumference(s) | Bioelectrical impedance, or dual-energy x-ray <sup>3</sup> | Handgrip strength | Plasma vitamins | Serum albumin |             |                                                                                                                                                                               |
| Evaluate effectiveness of interdisciplinary multicomponent intervention program to prevent disability in older people.                                                                                 | SF-12                  | ✓                      |                           | SNAQ                      |                                      |     |                                     |                                                            | ✓                 |                 |               | Netherlands | The effectiveness of a PROactive Multicomponent Intervention Program on disability in independently living older people: a randomized controlled trial (2018) (20)            |
| Examine effect of tailored nutrition guidance on nutrition, HRQoL, falls in people with Alzheimer's disease.                                                                                           | 15-D                   | ✓                      |                           | MNA                       | ✓                                    | ✓   |                                     |                                                            |                   |                 |               | Finland     | Nutritional guidance improves nutrient intake and quality of life, and may prevent falls in aged persons with Alzheimer disease living with a spouse (NuAD Trial) (2015) (21) |
| Evaluate effectiveness of introducing dietitian-led discharge planning and follow-up program within usual resources to improve nutrition, functional recovery in older adults at risk of malnutrition. | AQoL-6D                |                        |                           | MST, MNA                  | ✓                                    | ✓   |                                     |                                                            | ✓                 |                 |               | Australia   | Improving nutritional discharge planning and follow up in older medical inpatients: Hospital to Home Outreach for Malnourished Elders (2018) (22)                             |

**Table. (continued)**

| Study Objective                                                                                                                                                                                  | QoL Instrument(s) used | Nutrition Indices Used |                           |                           |                                      |     |                                     |                                                            |                   |                 |               | Country     | Title (Year)                                                                                                                                                                                              |
|--------------------------------------------------------------------------------------------------------------------------------------------------------------------------------------------------|------------------------|------------------------|---------------------------|---------------------------|--------------------------------------|-----|-------------------------------------|------------------------------------------------------------|-------------------|-----------------|---------------|-------------|-----------------------------------------------------------------------------------------------------------------------------------------------------------------------------------------------------------|
|                                                                                                                                                                                                  |                        | Questionnaire          |                           |                           | Anthropometric                       |     |                                     | Biochemical                                                |                   |                 |               |             |                                                                                                                                                                                                           |
|                                                                                                                                                                                                  |                        | Diet <sup>1</sup>      | Difficulties <sup>2</sup> | Nutrition screening tools | Height, weight, and/or weight change | BMI | Skinfold(s) and/or circumference(s) | Bioelectrical impedance, or dual-energy x-ray <sup>3</sup> | Handgrip strength | Plasma vitamins | Serum albumin |             |                                                                                                                                                                                                           |
| <b>Nutrition Status-focused Studies</b>                                                                                                                                                          |                        |                        |                           |                           |                                      |     |                                     |                                                            |                   |                 |               |             |                                                                                                                                                                                                           |
| Evaluate QoL of noninstitutionalized population > 75 years old by determining nutrition and health status; investigate relationship between nutrition risk and QoL.                              | EQ-5D                  |                        |                           | MNA                       |                                      | ✓   |                                     |                                                            |                   |                 |               | Spain       | Quality of life and risk of malnutrition in a home-dwelling population over 75 years old (2017) (23)                                                                                                      |
| Evaluate association between oral/general health, QoL, malnutrition.                                                                                                                             | EQ-5D                  |                        | ✓                         |                           | ✓                                    | ✓   |                                     |                                                            |                   |                 |               | Netherlands | Are edentulousness, oral health problems and poor health-related quality of life associated with malnutrition in community-dwelling elderly (Aged 75 Years and Over)? A cross-sectional study (2018) (24) |
| Evaluate association between QoL, mortality, nutrition status, ADLs.                                                                                                                             | SF-36                  |                        | ✓                         |                           |                                      |     |                                     |                                                            |                   |                 | ✓             | Japan       | Impact of the serum level of albumin and self-assessed chewing ability on mortality, QOL, and ADLs for community-dwelling older adults at the age of 85: A 15 year follow up study (2020) (25)            |
| Evaluate association between preoperative nutritional status and preoperative physical function, patient reported QoL, body composition in colorectal cancer patients awaiting elective surgery. | SF-36                  |                        |                           | PG-SGA                    | ✓                                    | ✓   |                                     | ✓                                                          | ✓                 |                 | ✓             | Canada      | Colorectal cancer patients with malnutrition suffer poor physical and mental health before surgery (2021) (26)                                                                                            |



**Table. (continued)**

| Study Objective                                                                                                                                                                                                 | QoL Instrument(s) used | Nutrition Indices Used |                           |                           |                                      |     |                                     |                                                            |                   |                 |               | Country     | Title (Year)                                                                                                                                                  |
|-----------------------------------------------------------------------------------------------------------------------------------------------------------------------------------------------------------------|------------------------|------------------------|---------------------------|---------------------------|--------------------------------------|-----|-------------------------------------|------------------------------------------------------------|-------------------|-----------------|---------------|-------------|---------------------------------------------------------------------------------------------------------------------------------------------------------------|
|                                                                                                                                                                                                                 |                        | Questionnaire          |                           |                           | Anthropometric                       |     |                                     |                                                            | Biochemical       |                 |               |             |                                                                                                                                                               |
|                                                                                                                                                                                                                 |                        | Diet <sup>1</sup>      | Difficulties <sup>2</sup> | Nutrition screening tools | Height, weight, and/or weight change | BMI | Skinfold(s) and/or circumference(s) | Bioelectrical impedance, or dual-energy x-ray <sup>3</sup> | Handgrip strength | Plasma vitamins | Serum albumin |             |                                                                                                                                                               |
| Establish prevalence of high nutrition risk and associated health and social risk factors for New Zealand Māori and non-Māori in advanced age.                                                                  | SF-12                  |                        |                           | SCREEN II                 |                                      |     |                                     | ✓                                                          |                   |                 |               | New Zealand | Health and social factors associated with nutrition risk: results from Life and Living in Advanced Age: A cohort study in New Zealand (LILACS NZ) (2015) (27) |
| Evaluate association of undernutrition risk with HRQoL, life satisfaction controlling for age, gender, marital status, economic status, housing arrangement, education level, functional ability, and diseases. | SF-12                  | ✓                      | ✓                         |                           | ✓                                    | ✓   | ✓                                   |                                                            |                   |                 |               | Sweden      | Prevalence and association of undernutrition with quality of life among Swedish people Aged 60 years and above: results of the SNAC-B study (2015) (28)       |
| Determine 4-year outcomes of community-living older adults identified at 'nutrition risk' in 2014 Health, Work and Retirement Study.                                                                            | SF-12                  |                        |                           | SCREEN II-AB              |                                      |     |                                     |                                                            |                   |                 |               | New Zealand | Malnutrition Risk: Four Year Outcomes from the Health, Work and Retirement Study 2014 to 2018 (2022) (29)                                                     |

**Table. (continued)**

| Study Objective                                                                                                                                   | QoL Instrument(s) used | Nutrition Indices Used |                           |                           |                                      |     |                                     |                                                            |                   |                 |               | Country | Title (Year)                                                                                                                                                                               |
|---------------------------------------------------------------------------------------------------------------------------------------------------|------------------------|------------------------|---------------------------|---------------------------|--------------------------------------|-----|-------------------------------------|------------------------------------------------------------|-------------------|-----------------|---------------|---------|--------------------------------------------------------------------------------------------------------------------------------------------------------------------------------------------|
|                                                                                                                                                   |                        | Questionnaire          |                           |                           | Anthropometric                       |     |                                     |                                                            | Biochemical       |                 |               |         |                                                                                                                                                                                            |
|                                                                                                                                                   |                        | Diet <sup>1</sup>      | Difficulties <sup>2</sup> | Nutrition screening tools | Height, weight, and/or weight change | BMI | Skinfold(s) and/or circumference(s) | Bioelectrical impedance, or dual-energy x-ray <sup>3</sup> | Handgrip strength | Plasma vitamins | Serum albumin |         |                                                                                                                                                                                            |
| Examine relationship between socio-demographic factors, social resources, functional status, QoL, malnutrition/malnutrition risk in older adults. | WHOQOL-BREF            |                        |                           | MNA-SF                    | ✓                                    | ✓   |                                     |                                                            |                   |                 |               | Spain   | Quality of life, functional impairment and social factors as determinants of nutritional status in older adults: The VERISAÚDE study (2018) (30)                                           |
| <b>Validation/Test-focused Studies</b>                                                                                                            |                        |                        |                           |                           |                                      |     |                                     |                                                            |                   |                 |               |         |                                                                                                                                                                                            |
| Examine whether DASC-8 is useful for screening frailty and as comprehensive geriatric assessment.                                                 | EQ-5D                  |                        |                           | MNA-SF                    |                                      | ✓   |                                     | ✓                                                          |                   | ✓               |               | Japan   | Use of Dementia Assessment Sheet for Community-based Integrated Care System 8-items (DASC-8) for the screening of frailty and components of comprehensive geriatric assessment (2020) (31) |
| Relate MNA and SF-36 in older adult population (compare subjective and general health status measured by MNA and SF-36 in this population).       | SF-36                  |                        |                           | MNA                       |                                      |     |                                     |                                                            |                   |                 |               | Sweden  | Relationship between MNA and SF-36 in a free-living elderly population aged 70 to 75 (2005) (32)                                                                                           |

**Table. (continued)**

| Study Objective                                                                                                                                    | QoL Instrument(s) used | Nutrition Indices Used |                           |                           |                                      |     |                                     |                                                            |                   |                 |               | Country   | Title (Year)                                                                                                                                                                                         |
|----------------------------------------------------------------------------------------------------------------------------------------------------|------------------------|------------------------|---------------------------|---------------------------|--------------------------------------|-----|-------------------------------------|------------------------------------------------------------|-------------------|-----------------|---------------|-----------|------------------------------------------------------------------------------------------------------------------------------------------------------------------------------------------------------|
|                                                                                                                                                    |                        | Questionnaire          |                           |                           | Anthropometric                       |     |                                     |                                                            | Biochemical       |                 |               |           |                                                                                                                                                                                                      |
|                                                                                                                                                    |                        | Diet <sup>1</sup>      | Difficulties <sup>2</sup> | Nutrition screening tools | Height, weight, and/or weight change | BMI | Skinfold(s) and/or circumference(s) | Bioelectrical impedance, or dual-energy x-ray <sup>3</sup> | Handgrip strength | Plasma vitamins | Serum albumin |           |                                                                                                                                                                                                      |
| Consider how DST risk categories differ by demographic, anthropometric, cognitive, functional, psychosocial, behavioral variables in older adults. | SWLS                   | ✓                      |                           |                           | ✓                                    | ✓   |                                     |                                                            |                   |                 |               | US        | Differences in psychosocial and behavioral variables by dietary screening tool risk category in older adults (2018) (33)                                                                             |
| <b>Quality of Life-focused Studies</b>                                                                                                             |                        |                        |                           |                           |                                      |     |                                     |                                                            |                   |                 |               |           |                                                                                                                                                                                                      |
| Examine association between oral/general health and QoL.                                                                                           | EQ-5D, OHIP            | ✓                      | ✓                         |                           |                                      |     |                                     |                                                            |                   |                 |               | Australia | Health behaviours and quality of life in independently living South Australians aged 75 years or older (2018) (34)                                                                                   |
| Assess QoL in chronically-ill older adults and its relationship with parameters concerning nutrition status.                                       | WHOQOL-BREF            | ✓                      |                           | MNA                       |                                      | ✓   |                                     |                                                            |                   |                 |               | Spain     | Nutritional status in chronically-ill elderly patients. Is it related to quality of life? (2014) (35)                                                                                                |
| <b>Other Studies</b>                                                                                                                               |                        |                        |                           |                           |                                      |     |                                     |                                                            |                   |                 |               |           |                                                                                                                                                                                                      |
| Assess effect of ONS prescription on hospitalization risk, healthcare cost.                                                                        | EQ-5D                  |                        | ✓                         |                           | ✓                                    | ✓   |                                     |                                                            |                   |                 |               | France    | Compliance to oral nutritional supplementation decreases the risk of hospitalisation in malnourished older adults without extra health care cost: Prospective observational cohort study (2020) (36) |

**Table. (continued)**

| Study Objective                                                                                                                                                             | QoL Instrument(s) used | Nutrition Indices Used |                           |                           |                                      |     |                                     |                                                            |                   |                 |               | Country | Title (Year)                                                                                                     |
|-----------------------------------------------------------------------------------------------------------------------------------------------------------------------------|------------------------|------------------------|---------------------------|---------------------------|--------------------------------------|-----|-------------------------------------|------------------------------------------------------------|-------------------|-----------------|---------------|---------|------------------------------------------------------------------------------------------------------------------|
|                                                                                                                                                                             |                        | Questionnaire          |                           |                           | Anthropometric                       |     |                                     |                                                            | Biochemical       |                 |               |         |                                                                                                                  |
|                                                                                                                                                                             |                        | Diet <sup>1</sup>      | Difficulties <sup>2</sup> | Nutrition screening tools | Height, weight, and/or weight change | BMI | Skinfold(s) and/or circumference(s) | Bioelectrical impedance, or dual-energy x-ray <sup>3</sup> | Handgrip strength | Plasma vitamins | Serum albumin |         |                                                                                                                  |
| Evaluate factors associated with frailty (including clinical background, physical/ cognitive function, total physical activity, daily protein intake, QoL, frailty status). | WHOQOL-BREF            | ✓                      |                           | BDHQ                      |                                      | ✓   |                                     |                                                            | ✓                 |                 |               | Japan   | Impact of quality of life on future frailty status of rural Japanese community-dwelling older adults (2022) (37) |

1. (e.g. deficiencies, intake, variety)
2. (e.g. appetite, dental, eating alone, swallowing, perceived difficulties)
3. (e.g. lean mass, appendicular lean mass, muscle mass, fat mass)

**Abbreviations Used**

**General:** ADLs: Activities of Daily Living; BMI: Body Mass Index; DASC-8: Dementia Assessment Sheet for Community-based Integrated Care System 8-items; HRQoL: Health-related Quality of Life; LBM: Lean Body Mass; ONS: Oral Nutritional Supplement; QoL: Quality of Life.

**QoL instruments:** 15-D: 15-Dimensional instrument; AQoL-6D: Assessment of Quality of Life instrument-6D Version; EQ-5D: EuroQoL 5-Dimensions; OHIP: Oral Health Impact Profile; SF-12: 12-Item Short Form Health Survey; SF-36: 36-Item Short Form Health Survey; SWLS: Satisfaction With Life Scale; WHOQOL-BREF: World Health Organization Quality of Life-Bref.

**Nutrition questionnaires:** BDHQ: Brief-type Self-administered Diet History Questionnaire; DHD-FFQ: Dutch Health Diet FFQ; DST: Dietary Screening Tool; MNA: Mini Nutritional Assessment; MNA-SF: Mini Nutritional Assessment-Short Form; MST: Malnutrition Screening Tool; MUST: Malnutrition Universal Screening Tool; NRS-2002: Nutritional Risk Screening 2002; PG-SGA: Scored Patient-Generated Subjective Global Assessment; SCREEN II: Seniors in the community: risk evaluation for eating and nutrition, Version II; SCREEN II-AB: SCREEN-II-Abbreviated; SNAQ: Simplified Nutritional Appetite Questionnaire.

## References

1. Edington J, Barnes R, Bryan F, Dupree E, Frost G, Hickson M, et al. A prospective randomized controlled trial of nutritional supplementation in malnourished elderly in the community: clinical and health economic outcomes. *Clin Nutr.* (2004) 23:195–204. doi: 10.1016/S0261-5614(03)00107-9
2. Avenell A, Campbell MK, Cook JA, Hannaford PC, Kilonzo MM, McNeill G, et al. Effect of multivitamin and multimineral supplements on morbidity from infections in older people (MAVIS trial): pragmatic, randomised, double blind, placebo controlled trial. *BMJ.* (2005) 331:324–9. doi: 10.1136/bmj.331.7512.324
3. Andersson J, Hulander E, Rothenberg E, Iversen P. Effect on body weight, quality of life and appetite following individualized, nutritional counselling to home-living elderly after rehabilitation - an open randomized trial. *J Nutr Health Aging.* (2017) 21:811–8. doi: 10.1007/s12603-016-0825-8
4. Sharma Y, Thompson CH, Kaambwa B, Shahi R, Hakendorf P, Miller M. Investigation of the benefits of early malnutrition screening with telehealth follow up in elderly acute medical admissions. *QJM.* (2017) 110:639–47. doi: 10.1093/qjmed/hcx095
5. Lindhardt T, Nielsen MH. Older patients' use of technology for a post-discharge nutritional intervention – a mixed-methods feasibility study. *Int J Med Inform.* (2017) 97:312–21. doi: 10.1016/j.ijmedinf.2016.10.017
6. Martin PM, Agudo FR, Medina JAL, Paris AS, Santabalbina FT, Pascual JRD, et al. Effectiveness of an oral diabetes-specific supplement on nutritional status, metabolic control, quality of life, and functional status in elderly patients. A multicentre study. *Clin Nutr.* (2019) 38:1253–61. doi: 10.1016/j.clnu.2018.05.007
7. Husted MM, Beck AM, Ulrikkeholm LK. Involving community-dwelling older adults in activities related to meals as part of a rehabilitation program: a single-blinded cluster-controlled study. *Clin Rehabil.* (2019) 33(7):1185–96. doi: 10.1177/0269215519837742
8. Van Dongen EJI, Haveman-Nies A, Doets EL, Dorhout BG, de Groot LCPGM. Effectiveness of a diet and resistance exercise intervention on muscle health in older adults: ProMuscle in practice. *J Am Med Dir Assoc.* (2020) 21:1065–1072.e3. doi: 10.1016/j.jamda.2019.11.026
9. Smith TR, Cawood AL, Walters ER, Guildford N, Stratton RJ. Ready-made oral nutritional supplements improve nutritional outcomes and reduce health care use--a randomised trial in older malnourished people in primary care. *Nutrients.* (2020) 12:517. doi: 10.3390/nu12020517
10. Payette H, Boutier V, Coulombe C, Gray-Donald K. Benefits of nutritional supplementation in free-living, frail, undernourished elderly people: a prospective randomized community trial. *J Am Diet Assoc.* (2002) 102:1088–95. doi: 10.1016/S0002-8223(02)90245-2
11. Forster SE, Powers HJ, Foulds GA, Flower DJ, Hopkinson K, Parker SG, et al. Improvement in nutritional status reduces the clinical impact of infections in older adults. *J Am Geriatr Soc.* (2012) 60:1645–54. doi: 10.1111/j.1532-5415.2012.04118.x
12. Kwon J, Yoshida Y, Yoshida H, Kim H, Suzuki T, Lee Y. Effects of a combined physical training and nutrition intervention on physical performance and health-related quality of life in prefrail older women living in the community: a randomized controlled trial. *J Am Med Dir Assoc.* (2015) 16:263.e1–8. doi: 10.1016/j.jamda.2014.12.005
13. Johansson P, Dahlstrom O, Dahlstrom U, Alehagen . Improved health-related quality of life, and more days out of hospital with supplementation with selenium and coenzyme Q10 combined. results from a double blind, placebo-controlled prospective study. *J Nutr Health Aging.* 19:870–7. doi: 10.1007/s12603-015-0509-9
14. Pedersen JL, Pedersen PU, Damsgaard EM. Early nutritional follow-up after discharge prevents deterioration of ADL functions in malnourished, independent, geriatric patients who live alone - a randomized clinical trial. *J Nutr Health Aging.* (2016) 20:845–53. doi: 10.1007/s12603-015-0629-2

15. Visvanathan R, Piantadosi C, Lange K, Naganathan V, Hunter P, Cameron ID, et al. The randomized control trial of the effects of testosterone and a nutritional supplement on hospital admissions in undernourished, community dwelling, older people. *J Nutr Health Aging*. (2016) 20:769–79. doi: 10.1007/s12603-016-0689-y
16. Doorn-van Atten M, Haveman-Nies A, van Bakel MM, Fery M, Franco M, de Groot LCPGM, et al. Effects of a multi-component nutritional telemonitoring intervention on nutritional status, diet quality, physical functioning and quality of life of community-dwelling older adults. *Br J Nutr* (2018) 119:1185–1194. doi: 10.1017/S0007114518000843
17. von Berens A, Fielding RA, Gustafsson T, Kirn D, Laussen J, Nydahl M, et al. Effect of exercise and nutritional supplementation on health-related quality of life and mood in older adults: the VIVE2 randomized controlled trial. *BMC Geriatr*. (2018) 18:286. doi: 10.1186/s12877-018-0976-z
18. Bhasin S, Apovian CM, Travison TG, Pencina K, Moore LL, Huang G, et al. Effect of protein intake on lean body mass in functionally limited older men: a randomized clinical trial. *JAMA Intern Med*. (2019) 178:530–41. doi: 10.1001/jamainternmed.2018.0008
19. Jadcak AD, Visvanathan R, Barnard R, Luscombe-Marsh N. A randomized controlled pilot exercise and protein effectiveness supplementation study (EXPRESS) on reducing frailty risk in community-dwelling older people. *J Nutr Gerontol Geriatr*. (2021) 40:26–45. doi: 10.1080/21551197.2021.1886222
20. van Lieshout MRJ, Bleijenberg N, Shuurmans MJ, de Wit NJ. The effectiveness of a PROactive multicomponent intervention program on disability in independently living older people: a randomized controlled trial. *J Nutr Health Aging*. (2018) 22:1051–9. doi: 10.1007/s12603-018-1101-x
21. Suominen JH, Puranen TM, Jyvakorpi SK, Eloniemi-Sulkava U, Kautiainen H, Siljamaki-Ojansuu U, et al. Nutritional guidance improves nutrient intake and quality of life, and may prevent falls in aged persons with Alzheimer disease living with a spouse. *J Nutr Health Aging*. (2015) 19:901–7. doi: 10.1007/s12603-015-0558-0
22. Young AM, Mudge AM, Banks MD, Rogers L, Demedio K, Isenring E. Improving nutritional discharge planning and follow up in older medical inpatients: hospital to home outreach for malnourished elders. *Nutr Diet*. (2019) 75:283–90. doi: 10.1111/1747-0080.12408
23. Hernandez-Galiot A, Goni I. Quality of life and risk of malnutrition in a home-dwelling population over 75 years old. *Nutrition*. (2017) 35:81–6. doi: 10.1016/j.nut.2016.10.013
24. Bakker MH, Vissink A, Spoorenberg SLW, Jager-Wittenaar H, Wynia K, Visser A. Are edentulousness, oral health problems and poor health-related quality of life associated with malnutrition in community-dwelling elderly (aged 75 years and over)? A cross-sectional study. *Nutrients*. (2018) 10:1965. doi: 10.3390/nu10121965
25. Nomura Y, Kakuta E, Okada A, Otsuka R, Shimada M, Tomizawa Y, et al. Impact of the serum level of albumin and self-assessed chewing ability on mortality, QOL, and ADLs for community-dwelling older adults at the age of 85: a 15 year follow up study. *Nutrients*. (2020) 12:3315. doi: 10.3390/nu12113315
26. Gillis C, Richer L, Fenton TF, Gramlich L, Keller H, Culos-Reed N, et al. Colorectal cancer patients with malnutrition suffer poor physical and mental health before surgery. *Surgery*. (2021) 170:841–7. doi: 10.1016/j.surg.2021.04.003
27. Wham CA, Teh R, Moyes S, Dyall L, Kepa M, Hayman K, et al. Health and social factors associated with nutrition risk: results from life and living in advanced age: a cohort study in New Zealand. *J Nutr Health Aging*. (2015) 19:637–45. doi: 10.1007/s12603-015-0514-z
28. Naseer M, Fageerstrom C. Prevalence and association of undernutrition with quality of life among Swedish people aged 60 years and above: results of the SNAC-B study. *J Nutr Health Aging*. (2015) 19:970–9. doi: 10.1007/s12603-015-0656-z

29. Wham C, Curnow J, Towers A. Malnutrition risk: four year outcomes from the health, work and retirement study 2014 to 2018. *Nutrients*. 14:2205. doi: 10.3390/nu14112205
30. Maseda A, Diego-Diez C, Lorenzo-Lopez L, Lopez-Lopez R, Regueiro-Folgueira L, Milan-Calenti J. Quality of life, functional impairment and social factors as determinants of nutritional status in older adults: the VERISAÚDE study. *Clin Nutr*. (2018) 37:993–9. doi: 10.1016/j.clnu.2017.04.009
31. Toyoshima K, Araki A, Tamura Y, Ishikawa J, Kodera R, Oba K, et al. Use of dementia assessment sheet for community-based integrated care system 8-items (DASC-8) for the screening of frailty and components of comprehensive geriatric assessment. *Geriatr Gerontol Int*. (2020) 20:1157–63. doi: 10.1111/ggi.14057
32. Eriksson BG, Dey DK, Hessler RM, Steen G, Steen B. Relationship between MNA and SF-36 in a free-living elderly population aged 70 to 75. *J Nutr Health Aging*. (2005) 9:212–20.
33. Greene GW, Lofgren I, Paulin C, Greaney ML, Clark PG. Differences in psychosocial and behavioral variables by dietary screening tool risk category in older adults. *J Acad Nutr Diet*. (2018) 118:110–7. doi: 10.1016/j.jand.2017.06.365
34. Amarasena N, Keuskamp D, Balasubramanian M, Brennan DS. Health behaviours and quality of life in independently living south Australians aged 75 years or older. *Aust Dent J*. (2018) 63:156–62. doi: 10.1111/adj.12583
35. Artacho R, Lujano C, Sanchez-Vico AB, Sanchez CV, Calvo JG, Bouzas PR et al. Gonzalez J, Nutritional status in chronically-ill elderly patients. Is it related to quality of life? *J Nutr Health Aging* (2014) 18:192–197.
36. Seguy D, Hubert H, Robert J, Meunier JP, Guerin O, Raynaud-Simon A. Compliance to oral nutritional supplementation decreases the risk of hospitalisation in malnourished older adults without extra health care cost: prospective observational cohort study. *Clin Nutr*. (2020) 39:1900–7. doi: 10.1016/j.clnu.2019.08.005
37. Mori T, Nagai K, Tamaki K, Kusunoki H, Wada Y, Tsuji S, et al. Impact of quality of life on future frailty status of rural Japanese community-dwelling older adults. *Exp Gerontol*. (2022) 168:111930. doi: 10.1016/j.exger.2022.111930
